# Supplementary material for: Evaluating the overall performance of immobilized particles through different crosslinking strategies and their nitrification characteristics
Source: Royal Society of Chemistry journal article supplement (doi:10.1039/d2ew00828a), 2023-01-01
Supplement: d2ew00828a1.pdf [file d2ew00828a1.pdf]

### **Supplementary materials**

**Fig. 1S.** Schematic diagram for preparation of immobilized particles.

**Fig. 2S.** The immobilized particle-bioreactor in daily operation.

**Fig. 3S.** Two step crosslinking immobilized particles before and after swelling experiment.

**Fig. 4S.** The CLSM images of PVA-SA(S) and PVA-SA(N) particles.

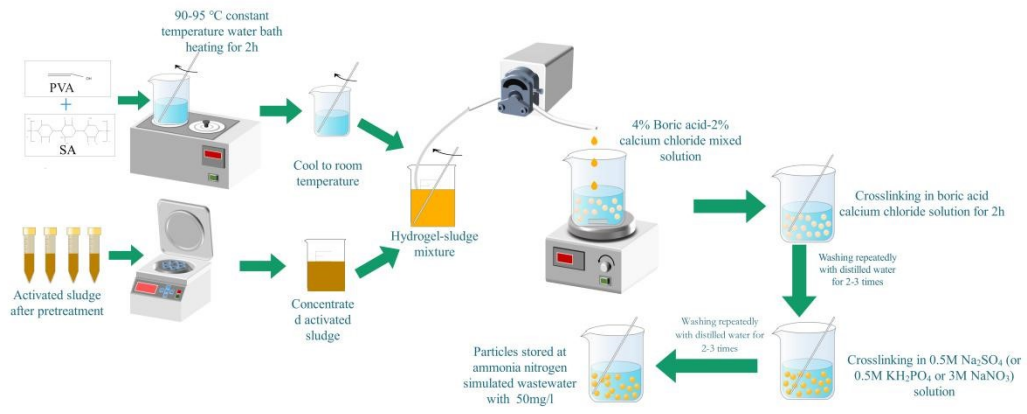

**Fig. 1S.** Schematic diagram for preparation of immobilized particles.

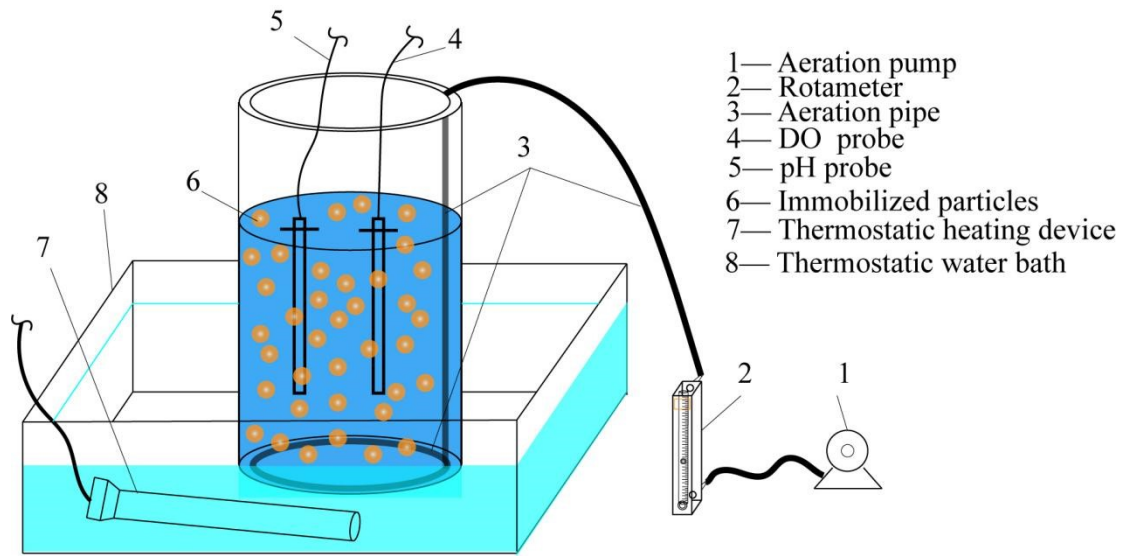

**Fig. 2S.** The immobilized particle-bioreactor in daily operation.

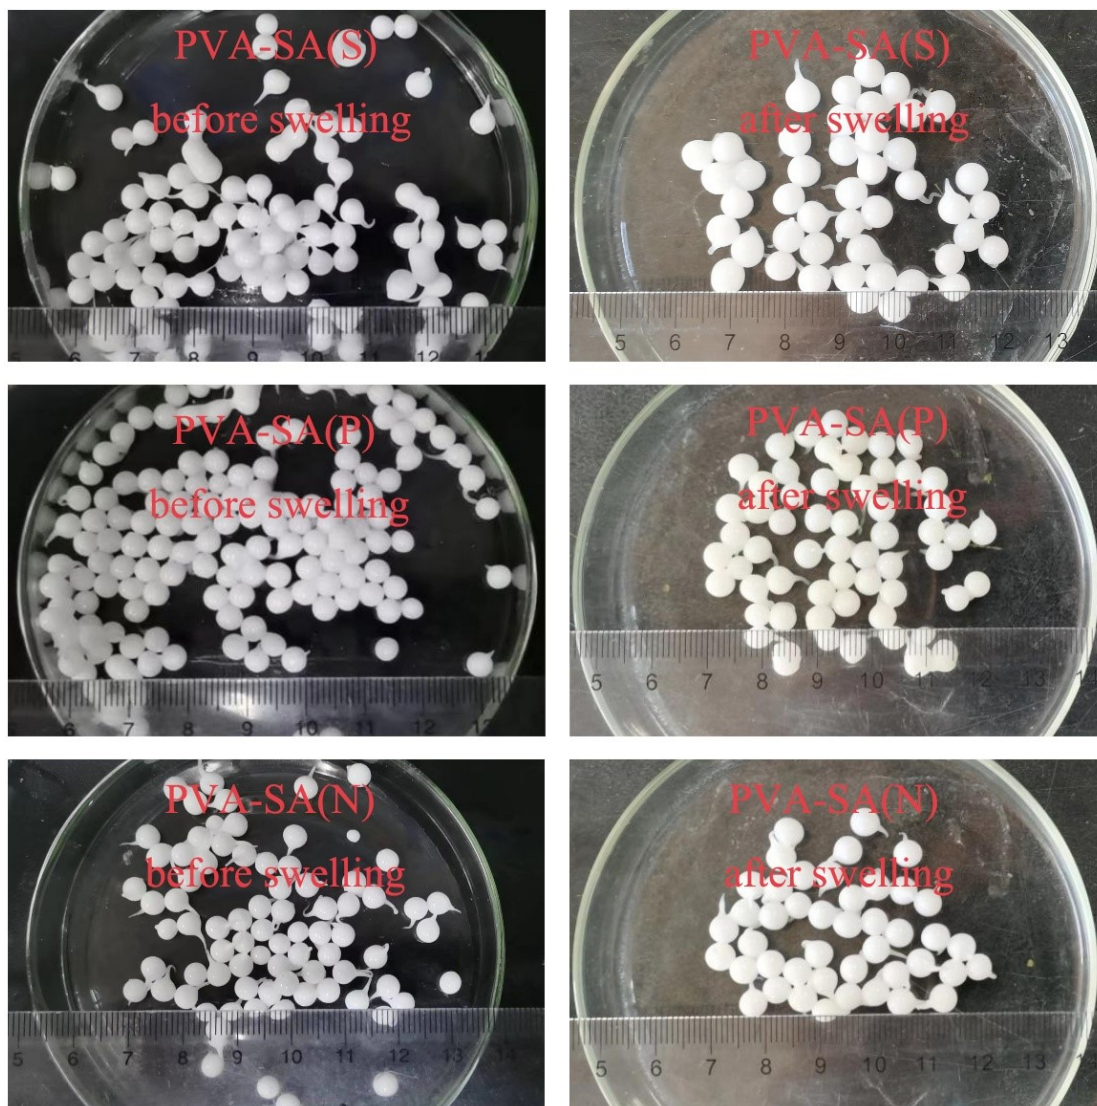

**Fig. 3S.** Two step crosslinking immobilized particles before and after swelling experiment.

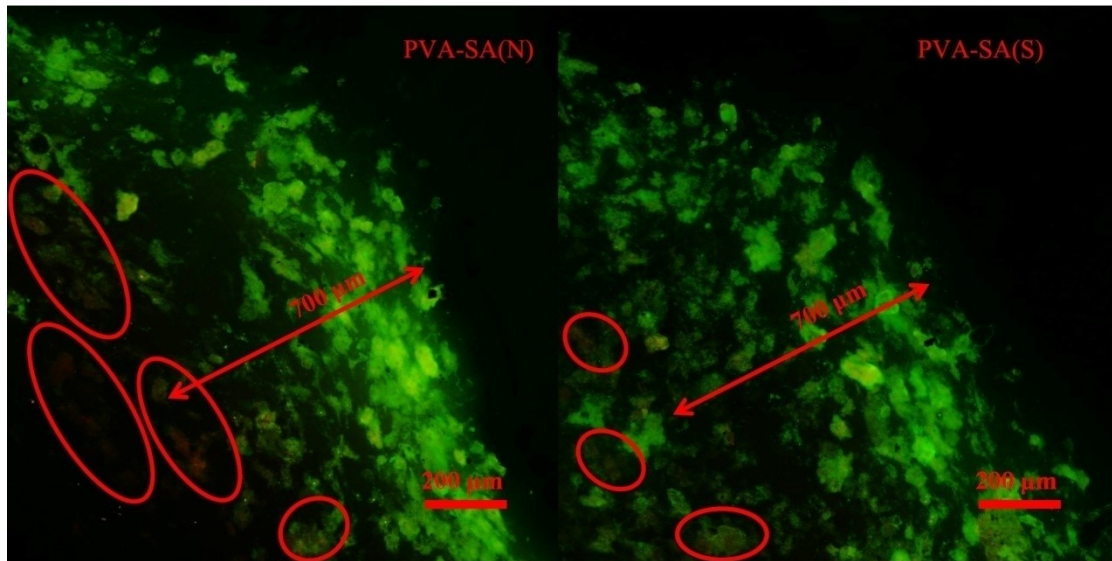

**Fig. 4S.** The CLSM images of PVA-SA(S) and PVA-SA(N) particles.
